# Supplementary material
Source: PubMed Central journal article supplement (PMC6642642)

**Supplementary Table 1.** GeneAnalytics- Brain Endothelial Cell Pathways in Bulk RNAseq: Young versus Aged -Pooled Hippocampal and Cortical BECs

| <b>Results</b> |                                                                                                     |                                |                                  |
|----------------|-----------------------------------------------------------------------------------------------------|--------------------------------|----------------------------------|
| <b>Score</b>   | <b>SuperPath Name</b>                                                                               | <b># SuperPath Total Genes</b> | <b># SuperPath Matched Genes</b> |
| <b>37.75</b>   | Metabolism                                                                                          | 2543                           | 207                              |
| <b>27.91</b>   | Phospholipase-C Pathway                                                                             | 498                            | 59                               |
| <b>27.19</b>   | ERK Signaling                                                                                       | 1177                           | 107                              |
| <b>27.11</b>   | Degradation of The Extracellular Matrix                                                             | 298                            | 42                               |
| <b>26.88</b>   | Neuroscience                                                                                        | 323                            | 44                               |
| <b>24.86</b>   | Transport of Glucose and Other Sugars, Bile Salts and Organic Acids, Metal Ions and Amine Compounds | 678                            | 70                               |
| <b>24.47</b>   | Angiogenesis (CST)                                                                                  | 87                             | 20                               |
| <b>23.66</b>   | AGE-RAGE Signaling Pathway in Diabetic Complications                                                | 99                             | 21                               |
| <b>22.47</b>   | Non-integrin Membrane-ECM Interactions                                                              | 46                             | 14                               |
| <b>22.39</b>   | Response to Elevated Platelet Cytosolic Ca <sup>2+</sup>                                            | 640                            | 65                               |
| <b>22.22</b>   | RET Signaling                                                                                       | 974                            | 88                               |
| <b>22.07</b>   | Cell Adhesion Endothelial Cell Contacts By Non-junctional Mechanisms                                | 40                             | 13                               |
| <b>21.31</b>   | Apoptotic Pathways in Synovial Fibroblasts                                                          | 725                            | 70                               |
| <b>19.91</b>   | Ras Signaling Pathway                                                                               | 322                            | 39                               |
| <b>19.25</b>   | Adhesion                                                                                            | 110                            | 20                               |
| <b>18.89</b>   | VEGF Pathway (Qiagen)                                                                               | 122                            | 21                               |
| <b>18.3</b>    | Mechanisms of CFTR Activation By S-nitrosoglutathione (normal and CF)                               | 43                             | 12                               |
| <b>18.24</b>   | Diseases of Glycosylation                                                                           | 86                             | 17                               |

Super Pathway Analysis of bulk RNAseq data from young versus aged pooled hippocampal and cortical BECs. Canonical pathways that are differentially regulated in aged BECs were identified by GeneAnalytics (GSEA) software.

|              |                                                                                   |      |     |
|--------------|-----------------------------------------------------------------------------------|------|-----|
| <b>18.21</b> | Development<br>VEGF Signaling Via<br>VEGFR2 - Generic<br>Cascades                 | 147  | 23  |
| <b>17.99</b> | Actin Nucleation By<br>ARP-WASP<br>Complex                                        | 341  | 39  |
| <b>17.8</b>  | Photodynamic<br>Therapy-induced<br>HIF-1 Survival<br>Signaling                    | 37   | 11  |
| <b>17.77</b> | Cell Adhesion_ECM<br>Remodeling                                                   | 61   | 14  |
| <b>17.74</b> | MAP Kinase<br>Signaling                                                           | 108  | 19  |
| <b>17.19</b> | Signaling By GPCR                                                                 | 2601 | 181 |
| <b>17.12</b> | P70S6K Signaling                                                                  | 390  | 42  |
| <b>16.84</b> | NRF2 Pathway                                                                      | 145  | 22  |
| <b>16.84</b> | EPH-Ephrin<br>Signaling                                                           | 145  | 22  |
| <b>16.55</b> | ECM<br>Proteoglycans                                                              | 57   | 13  |
| <b>16.44</b> | PAK Pathway                                                                       | 682  | 62  |
| <b>16.44</b> | Cell<br>Adhesion_Plasmin<br>Signaling                                             | 49   | 12  |
| <b>16.38</b> | Myometrial<br>Relaxation and<br>Contraction<br>Pathways                           | 218  | 28  |
| <b>16.08</b> | Fluid Shear Stress<br>and<br>Atherosclerosis                                      | 139  | 21  |
| <b>15.71</b> | NFAT and Cardiac<br>Hypertrophy                                                   | 326  | 36  |
| <b>15.36</b> | Blood-Brain Barrier<br>and Immune Cell<br>Transmigration:<br>Pathways<br>Overview | 71   | 14  |
| <b>15.31</b> | Integrin Pathway                                                                  | 568  | 53  |
| <b>15.22</b> | ECM-receptor<br>Interaction                                                       | 112  | 18  |
| <b>15.18</b> | Signaling in Gap<br>Junctions                                                     | 180  | 24  |
| <b>14.84</b> | Focal Adhesion                                                                    | 283  | 32  |
| <b>14.78</b> | Sertoli-Sertoli Cell<br>Junction Dynamics                                         | 391  | 40  |
| <b>14.74</b> | Nanog in<br>Mammalian ESC<br>Pluripotency                                         | 533  | 50  |

|              |                                                                 |      |    |
|--------------|-----------------------------------------------------------------|------|----|
| <b>14.65</b> | HIV Life Cycle                                                  | 865  | 72 |
| <b>14.62</b> | HIF-1-alpha<br>Transcription<br>Factor Network                  | 65   | 13 |
| <b>14.58</b> | Cell Adhesion_Cell-<br>matrix<br>Glycoconjugates                | 39   | 10 |
| <b>14.36</b> | Amoebiasis                                                      | 96   | 16 |
| <b>14.15</b> | FMLP Pathway                                                    | 317  | 34 |
| <b>13.85</b> | Akt Signaling                                                   | 681  | 59 |
| <b>13.62</b> | Neurotransmitter<br>Release Cycle                               | 51   | 11 |
| <b>13.57</b> | Drug Metabolism -<br>Cytochrome P450                            | 134  | 19 |
| <b>13.36</b> | L1CAM Interactions                                              | 102  | 16 |
| <b>13.2</b>  | GPCR Pathway                                                    | 708  | 60 |
| <b>13.09</b> | VEGF Signaling<br>Pathway                                       | 93   | 15 |
| <b>12.8</b>  | Developmental<br>Biology                                        | 1079 | 83 |
| <b>12.78</b> | Primary Focal<br>Segmental<br>Glomerulosclerosis<br>FSGS        | 74   | 13 |
| <b>12.67</b> | Metabolism of<br>Water-soluble<br>Vitamins and<br>Cofactors     | 177  | 22 |
| <b>12.63</b> | Beta-Adrenergic<br>Signaling                                    | 308  | 32 |
| <b>12.52</b> | Tyrosine Kinases /<br>Adaptors                                  | 142  | 19 |
| <b>12.48</b> | BMAL1-<br>CLOCK,NPAS2<br>Activates Circadian<br>Gene Expression | 86   | 14 |
| <b>12.43</b> | Metabolic States<br>and Circadian<br>Oscillators                | 10   | 5  |
| <b>12.43</b> | Prostaglandin<br>Synthesis and<br>Regulation                    | 30   | 8  |
| <b>12.39</b> | Cell Surface<br>Interactions at The<br>Vascular Wall            | 143  | 19 |
| <b>12.39</b> | Pathways in<br>Cancer                                           | 395  | 38 |
| <b>12.25</b> | Neuropathic Pain-<br>Signaling in Dorsal<br>Horn Neurons        | 232  | 26 |
| <b>12.16</b> | S1P3 Pathway                                                    | 48   | 10 |

|              |                                                                                                |     |    |
|--------------|------------------------------------------------------------------------------------------------|-----|----|
| <b>12.13</b> | HIF-1 Signaling Pathway                                                                        | 99  | 15 |
| <b>12.11</b> | Circadian Rhythm                                                                               | 31  | 8  |
| <b>11.81</b> | Ca, CAMP and Lipid Signaling                                                                   | 124 | 17 |
| <b>11.7</b>  | Arginine and Proline Metabolism                                                                | 50  | 10 |
| <b>11.65</b> | MAPK Signaling Pathway                                                                         | 279 | 29 |
| <b>11.48</b> | Platelet Aggregation Inhibitor Pathway, Pharmacodynamics                                       | 51  | 10 |
| <b>11.47</b> | Sudden Infant Death Syndrome (SIDS) Susceptibility Pathways                                    | 163 | 20 |
| <b>11.42</b> | NOTCH1 Regulation of Human Endothelial Cell Calcification                                      | 18  | 6  |
| <b>11.33</b> | Thyroid Hormone Signaling Pathway                                                              | 116 | 16 |
| <b>11.32</b> | Apoptosis Pathway                                                                              | 152 | 19 |
| <b>11.28</b> | PPAR Signaling Pathway                                                                         | 72  | 12 |
| <b>11.1</b>  | PI3K-Akt Signaling Pathway                                                                     | 342 | 33 |
| <b>10.96</b> | Prion Diseases                                                                                 | 35  | 8  |
| <b>10.91</b> | RhoGDI Pathway                                                                                 | 181 | 21 |
| <b>10.71</b> | Angiopoietin Like Protein 8 Regulatory Pathway                                                 | 196 | 22 |
| <b>10.52</b> | Phospholipase D Signaling Pathway                                                              | 185 | 21 |
| <b>10.48</b> | Regulation of Lipid Metabolism By Peroxisome Proliferator-activated Receptor Alpha (PPARalpha) | 280 | 28 |
| <b>10.33</b> | Glycosaminoglycan Metabolism                                                                   | 296 | 29 |
| <b>10.33</b> | ADP Signalling Through P2Y Purinoceptor 1                                                      | 67  | 11 |
| <b>10.1</b>  | P75 NTR Receptor-mediated Signalling                                                           | 216 | 23 |

**Supplementary Table 2: Proteomics List of differentially regulated proteins with human aging (see reference for Source Proteomics Data)**

| Protein                             | Spearman's Correlation Coefficient | P value Spearman | Q value Spearman | Vascular Specific Function? (GeneCards)                                                                                                                                                                                                                                                                                                                                                                                                                                                                                                | Expressed in mouse Brain Endothelial Cells? |
|-------------------------------------|------------------------------------|------------------|------------------|----------------------------------------------------------------------------------------------------------------------------------------------------------------------------------------------------------------------------------------------------------------------------------------------------------------------------------------------------------------------------------------------------------------------------------------------------------------------------------------------------------------------------------------|---------------------------------------------|
| VCAM1                               | 0.470281976                        | 7.73E-08         | 5.72E-06         | Yes; Ig superfamily; and encodes a cell surface sialoglycoprotein expressed by cytokine-activated endothelium. Type I membrane protein mediates leukocyte-endothelial cell adhesion and signal transduction, involved in atherosclerosis and rheumatoid arthritis. [provided by RefSeq, Dec 2010]                                                                                                                                                                                                                                      | Yes                                         |
| Alpha-Fetoprotein                   | 0.416308993                        | 2.75E-06         | 6.78E-05         | No                                                                                                                                                                                                                                                                                                                                                                                                                                                                                                                                     | No                                          |
| B2M                                 | 0.422267485                        | 1.91E-06         | 6.78E-05         | No                                                                                                                                                                                                                                                                                                                                                                                                                                                                                                                                     | Yes                                         |
| TNFR1                               | 0.409444059                        | 4.15E-06         | 7.67E-05         | No                                                                                                                                                                                                                                                                                                                                                                                                                                                                                                                                     | Yes                                         |
| MMP2                                | 0.397146169                        | 8.48E-06         | 0.0001255        | Member of the matrix metalloproteinase (MMP) gene family, that are zinc-dependent enzymes capable of cleaving components of the extracellular matrix and molecules involved in signal transduction. Involved in multiple pathways including roles in the nervous system, endometrial menstrual breakdown, regulation of vascularization, and metastasis. Mutations associated with Winchester syndrome and Nodulosis-Arthropathy-Osteolysis (NAO) syndrome. [provided by RefSeq, Oct 2014]                                             | No                                          |
| Alpha 1 Antitrypsin                 | 0.38028854                         | 2.16E-05         | 0.0002283        |                                                                                                                                                                                                                                                                                                                                                                                                                                                                                                                                        | No                                          |
| FABP3                               | 0.381176337                        | 2.06E-05         | 0.0002283        |                                                                                                                                                                                                                                                                                                                                                                                                                                                                                                                                        | No                                          |
| IL16                                | 0.365038767                        | 4.82E-05         | 0.0004456        |                                                                                                                                                                                                                                                                                                                                                                                                                                                                                                                                        | No                                          |
| CCL3 (MIP1 Alpha)                   | 0.3310868                          | 0.0002502        | 0.002057         |                                                                                                                                                                                                                                                                                                                                                                                                                                                                                                                                        | No                                          |
| TIMP1                               | 0.320871443                        | 0.0003962        | 0.0029319        |                                                                                                                                                                                                                                                                                                                                                                                                                                                                                                                                        | No                                          |
| CCL11 (Eotaxin)                     | 0.306534226                        | 0.0007354        | 0.0049474        |                                                                                                                                                                                                                                                                                                                                                                                                                                                                                                                                        | No                                          |
| Fibrinogen (alpha beta gamma chain) | 0.300444625                        | 0.0009476        | 0.0050087        | Blood-borne glycoprotein comprised of three pairs of nonidentical polypeptide chains. Following vascular injury, fibrinogen is cleaved by thrombin to form fibrin. In addition, various cleavage products of fibrinogen and fibrin regulate cell adhesion and spreading, display vasoconstrictor and chemotactic activities, and are mitogens for several cell types. Mutations lead to several disorders, including afibrinogenemia, dysfibrinogenemia, hypodysfibrinogenemia and thrombotic tendency. [provided by RefSeq, Jun 2014] | No                                          |
| MCSF                                | 0.301081975                        | 0.000923         | 0.0050087        |                                                                                                                                                                                                                                                                                                                                                                                                                                                                                                                                        | No                                          |
| TF                                  | 0.301655872                        | 0.0009014        | 0.0050087        | Glycoprotein which binds ferric iron. The function is to transport iron from the intestine, reticuloendothelial system, and liver parenchymal cells to all proliferating cells in the body. This protein may also have a physiologic role as granulocyte/pollen-binding protein (GPBP) involved in the removal of certain organic matter and allergens from serum. [provided by RefSeq, Sep 2009]                                                                                                                                      | No                                          |
| CEA                                 | 0.288317851                        | 0.0015449        | 0.0076216        |                                                                                                                                                                                                                                                                                                                                                                                                                                                                                                                                        | No                                          |
| CA19-9                              | 0.272433137                        | 0.00284          | 0.013135         |                                                                                                                                                                                                                                                                                                                                                                                                                                                                                                                                        | No                                          |
| CD40                                | 0.269243459                        | 0.0031958        | 0.0139113        |                                                                                                                                                                                                                                                                                                                                                                                                                                                                                                                                        | Yes                                         |
| CK-MB                               | 0.266629366                        | 0.0035168        | 0.0144582        |                                                                                                                                                                                                                                                                                                                                                                                                                                                                                                                                        | Yes                                         |
| ICAM1                               | 0.262891835                        | 0.0040261        | 0.0156807        | This gene encodes a cell surface glycoprotein which is typically expressed on endothelial cells and cells of the immune system. It binds to integrins of type CD11a / CD18, or CD11b / CD18 and is also exploited by Rhinovirus as a receptor. [provided by RefSeq, Jul 2008]                                                                                                                                                                                                                                                          | Yes                                         |
| Haptoglobin                         | 0.261114706                        | 0.0042907        | 0.0158756        |                                                                                                                                                                                                                                                                                                                                                                                                                                                                                                                                        | No                                          |
| CCL4 (MIP1 Beta)                    | 0.242723911                        | 0.0080894        | 0.0285055        |                                                                                                                                                                                                                                                                                                                                                                                                                                                                                                                                        | No                                          |
| MMP9                                | 0.23607641                         | 0.0100637        | 0.0338506        |                                                                                                                                                                                                                                                                                                                                                                                                                                                                                                                                        | No                                          |
| IL5                                 | -0.228459671                       | 0.0128359        | 0.039677         |                                                                                                                                                                                                                                                                                                                                                                                                                                                                                                                                        | No                                          |
| SHBG                                | 0.228379762                        | 0.0128682        | 0.039677         |                                                                                                                                                                                                                                                                                                                                                                                                                                                                                                                                        | No                                          |
| Myoglobin                           | 0.222396258                        | 0.0154983        | 0.0458751        |                                                                                                                                                                                                                                                                                                                                                                                                                                                                                                                                        | No                                          |
| CCL2 (MCP1)                         | 0.217513373                        | 0.017979         | 0.0511711        |                                                                                                                                                                                                                                                                                                                                                                                                                                                                                                                                        | No                                          |
| CRP                                 | 0.212186922                        | 0.0210696        | 0.0577462        |                                                                                                                                                                                                                                                                                                                                                                                                                                                                                                                                        | No                                          |
| IL18                                | 0.209314258                        | 0.0229185        | 0.0605703        |                                                                                                                                                                                                                                                                                                                                                                                                                                                                                                                                        | Yes                                         |
| IL3                                 | 0.206647865                        | 0.0247574        | 0.0631742        |                                                                                                                                                                                                                                                                                                                                                                                                                                                                                                                                        | No                                          |
| TNF-beta                            | 0.195707336                        | 0.0336803        | 0.0830781        |                                                                                                                                                                                                                                                                                                                                                                                                                                                                                                                                        | No                                          |
| EN-RAGE                             | 0.187102817                        | 0.0424813        | 0.101407         |                                                                                                                                                                                                                                                                                                                                                                                                                                                                                                                                        | No                                          |

Highlighted in Blue: Plasma proteins that are correlated with human aging (ages 50-89; Figure 1) and that are also expressed in murine BECs at the transcriptional level (Bulk RNAseq of young and aged BECs; Figure 1, Supplemental Fig. 1)

Proteomics Source Data: Britschgi, M. et al. Modeling of pathological traits in Alzheimer's disease based on systemic extracellular signaling proteome. *Mol. Cell. Proteomics* 10, M111.008862 (2011).

Violin Plot Values for Minimum, Maximum, Percentile, and Median for Figure 2, Extended Data Figure 1, Extended Data Figure 2, BRC, sCRNAseq

|                  | Vcam1      | Tfr1a      | Irf1        | Irf4       | Irf8       | Hita       | Kamt1      | Lgt1       | H2-K1      | B2m         | Tpo        | Eno2        | Bmx        | Jag1       | Eph4       | Vwf        | Nr2f2      | Em1        | Nectn1     | Ntnt1      | Vegf       | Hey1       | Ras        |
|------------------|------------|------------|-------------|------------|------------|------------|------------|------------|------------|-------------|------------|-------------|------------|------------|------------|------------|------------|------------|------------|------------|------------|------------|------------|
| 25th percent Cap | -4.57E-06  | -3.23E-06  | -3.79E-06   | -2.77E-06  | -2.06E-06  | -3.29E-06  | -4.19E-06  | -4.74E-06  | 0.0036552  | 2.70362138  | 3.73E-06   | -4.19E-06   | -3.79E-06  | 3.34E-06   | -3.79E-06  | 3.64E-07   | -3.89E-06  | -3.58E-06  | -1.99E-07  | -4.21E-06  | -4.80E-06  | -3.89E-06  | 3.90E-06   |
| Art              | 1.19E-05   | -4.58E-06  | -5.39E-06   | -7.95E-06  | -2.90E-06  | -4.41E-06  | -7.93E-06  | -8.69E-06  | 2.52294701 | 3.28243547  | 1.99165929 | -3.29E-06   | 0.30812766 | 1.55947662 | -7.93E-06  | 0.29244885 | -8.69E-06  | 9.09E-06   | 1.13E-05   | -5.76E-07  | -2.25E-06  | -2.39E-07  | 0.45692958 |
| Cap              | 6.71E-07   | -3.32E-06  | 0.0969987   | -2.28E-06  | 9.38E-06   | 8.32E-06   | -4.08E-06  | -4.51E-06  | 2.27264154 | 3.19546071  | 1.15E-06   | -7.92E-06   | -7.92E-06  | 3.71E-06   | -4.89E-06  | 2.04380758 | 1.78E-05   | -6.24E-06  | -1.82E-06  | -5.57E-06  | -8.63E-06  | -8.71E-06  | -2.72E-06  |
| Median           | 1.95E-06   | 5.77E-06   | 3.08E-06    | 3.95E-06   | 7.95E-06   | 5.00E-06   | 2.05E-06   | -2.51E-07  | -9.47E-07  | 3.15242799  | 3.67986156 | 3.39E-06    | 2.55E-06   | 0.05899888 | 4.16E-06   | 8.80E-06   | 2.55E-06   | -4.44E-06  | 1.81E-05   | 4.44E-06   | 1.13E-06   | 3.95E-06   | 0.60448956 |
| Art              | 2.2301209  | 3.74E-06   | -4.07E-07   | -4.07E-07  | 6.97E-06   | 6.29E-10   | -2.51E-07  | -9.47E-07  | 3.15242799 | 3.67986156  | 2.41489279 | 6.33E-06    | 1.50976027 | 1.99318965 | -7.76E-08  | 1.87597372 | -9.47E-07  | 1.24448992 | 0.6177776  | 1.02E-05   | 8.13E-06   | 2.29E-05   | 1.4240732  |
| Cap              | 0.00994087 | 0.01670281 | 1.175899761 | 1.25E-05   | 0.07231807 | 0.10716672 | 1.17E-05   | -1.38E-05  | 3.27333479 | 3.5509314   | 1.44005953 | -8.61E-07   | 8.61E-07   | 0.50670807 | 1.21E-05   | 2.27232876 | 0.65057783 | 1.09E-06   | 1.38E-05   | 1.90E-06   | 6.40E-06   | -1.22E-06  | 1.55982864 |
| 75th percent Art | 8.54E-06   | 1.59E-05   | 9.89E-06    | 1.39E-05   | 0.07232095 | 0.01722701 | 7.65E-06   | 6.54E-06   | 3.01283013 | 3.60046189  | 1.9287849  | 1.04E-05    | 9.14E-06   | 1.0982896  | 1.47E-05   | 0.7078979  | 1.02E-05   | 2.54E-06   | 0.98226274 | 0.02589218 | 6.40E-06   | 1.37E-05   | 1.55982864 |
| Cap              | 2.84793416 | 1.14144934 | 9.09E-06    | 7.38E-06   | 0.3471296  | 1.33E-05   | 9.93E-06   | 6.43E-06   | 3.1595799  | 3.94448161  | 2.38819938 | 1.08796448  | 2.50447292 | 2.72802944 | 1.33E-05   | 2.5793999  | 6.43E-06   | 2.55099108 | 1.61693976 | 1.17630978 | 1.5570959  | 1.9900728  | 1.7870793  |
| Art              | 2.46931011 | 1.89348237 | 2.41726878  | 1.41776448 | 2.01379859 | 2.04702263 | 1.5724231  | 2.65471994 | 3.54797507 | 3.84515843  | 2.08346425 | 9.59E-06    | 1.18E-05   | 1.24676149 | 1.55869873 | 3.45824645 | 1.28626519 | 1.31E-05   | 0.85037418 | 1.12308206 | 1.18E-05   | 7.89E-06   | 1.42108927 |
| Min              | -2.99E-05  | -2.99E-05  | -2.99E-05   | -2.99E-05  | -2.99E-05  | -2.99E-05  | -2.99E-05  | -2.99E-05  | -2.99E-05  | -2.99E-05   | -2.99E-05  | -2.99E-05   | -2.99E-05  | -2.99E-05  | -2.99E-05  | -2.99E-05  | -2.99E-05  | -2.99E-05  | -2.99E-05  | -2.99E-05  | -2.99E-05  | -2.99E-05  | -2.99E-05  |
| Cap              | -2.66E-05  | -2.66E-05  | -2.66E-05   | -2.70E-05  | -2.70E-05  | -2.44E-05  | -2.70E-05  | -2.70E-05  | -1.20E-05  | 1.179075636 | -1.20E-05  | -2.66E-05   | -2.44E-05  | 6.29E-10   | -2.41E-05  |
| Art              | -1.76E-05  | -1.85E-05  | -1.85E-05   | -1.76E-05  | -1.76E-05  | -1.85E-05  | -2.41E-05  | -1.85E-05  | 0.20050205 | 2.25710034  | -1.85E-05  | -2.41E-05   | -2.41E-05  | -2.41E-05  | -2.41E-05  | -2.41E-05  | -2.41E-05  | -2.41E-05  | -2.41E-05  | -2.41E-05  | -2.41E-05  | -2.41E-05  | -1.85E-05  |
| Max              | 4.18757952 | 2.88180013 | 2.09120862  | 2.72283103 | 2.84302196 | 2.76944782 | 2.1597322  | 1.26908154 | 4.54235496 | 4.59660266  | 3.10754843 | 2.02210822  | 3.24860778 | 2.29875996 | 2.47294352 | 3.66764419 | 2.15394922 | 2.870191   | 2.47359386 | 2.52144883 | 3.41994294 | 3.41994294 | 2.97480907 |
| Art              | 4.50912369 | 2.5195712  | 2.17293906  | 1.10738713 | 3.15935973 | 2.73758344 | 2.84316462 | 3.05837315 | 4.24754226 | 4.37680068  | 3.38976782 | 2.118506101 | 3.44450306 | 3.43902083 | 2.39575446 | 3.64598133 | 0.02770642 | 4.06735024 | 3.04356465 | 2.47555403 | 2.84307596 | 3.20996688 | 2.22031691 |
| Cap              | 4.68656434 | 2.90228018 | 3.883918103 | 3.09918494 | 2.67505859 | 3.92908413 | 4.63613232 | 4.29207504 | 4.63623699 | 2.8947301   | 0.70547955 | 3.57294199  | 2.04212727 | 2.78416917 | 3.30711695 | 2.37162128 | 2.06568368 | 2.89259402 | 1.92338423 | 2.66110464 |            |            |            |

In Ageless Young

|                  | Vcam1      | Odn        | Ddx5       | Pnap       | Tp1        | Bcsl1      | Kamt1 (in all BRC) | Kamt1 (in all BRC) |
|------------------|------------|------------|------------|------------|------------|------------|--------------------|--------------------|
| 25th percent Old | 0.00894768 | 3.8159554  | 7.71E-06   | 5.48E-06   | 6.15E-06   | 4.31E-06   | -5.53E-06          | -3.79E-06          |
| Young            | 1.90949294 | 4.13990687 | -6.31E-07  | 0.1210358  | 9.21E-06   | 4.32E-06   | 4.32E-06           | 4.32E-06           |
| Median           | 1.75665067 | 4.02497041 | 8.73E-07   | 0.15307051 | 9.21E-06   | 3.49E-06   | 3.49E-06           | 3.49E-06           |
| 75th percent Old | 2.61159042 | 4.3342144  | 7.30E-06   | 1.42969994 | 1.77393989 | 1.67E-05   | 9.17E-06           | 9.17E-06           |
| Young            | 2.39194428 | 4.34643131 | 7.30E-06   | 1.42969994 | 1.77393989 | 1.38E-05   | -2.70E-05          | -2.70E-05          |
| Min              | -1.66E-05  | 0.6135542  | -2.70E-05  | -1.66E-05  | -2.41E-05  | -2.70E-05  | -2.70E-05          | -2.70E-05          |
| Cap              | -2.66E-05  | -5.84E-06  | -2.99E-05  | -2.99E-05  | -2.99E-05  | -2.99E-05  | -2.99E-05          | -2.99E-05          |
| Art              | 3.55284016 | 4.69943113 | 2.06E-05   | 3.17366044 | 3.8216766  | 3.92908413 | 3.92908413         | 3.92908413         |
| Max              | 4.50912369 | 3.9150219  | 4.93704022 | 4.48627751 | 3.06574644 | 3.21521229 | 3.20821911         | 3.20821911         |

Values represent violin plots minima, maxima, centre, and percentile values corresponding to data in Fig. 2, Extended Data Fig. 1, and Extended Data Fig. 2.

Supplementary Table 4. Summary of *In Vivo* Experiments

| Mouse Type                                                                                                                                                                                                                                                                                                                              | Figure #            | Plasma type                                                                                                                                                                                                                                                            | Treatment paradigm                                                                                                                                                                                                                               | Neurogenesis                                                                                          |                                                                                                                         |                                                                                                | Microglial Activation                                                                                  |                                                                                                      | VCAM1 at the BBB                                                                                           | Behavior                                                                                                     |                                                                                                                                                                                                                          |
|-----------------------------------------------------------------------------------------------------------------------------------------------------------------------------------------------------------------------------------------------------------------------------------------------------------------------------------------|---------------------|------------------------------------------------------------------------------------------------------------------------------------------------------------------------------------------------------------------------------------------------------------------------|--------------------------------------------------------------------------------------------------------------------------------------------------------------------------------------------------------------------------------------------------|-------------------------------------------------------------------------------------------------------|-------------------------------------------------------------------------------------------------------------------------|------------------------------------------------------------------------------------------------|--------------------------------------------------------------------------------------------------------|------------------------------------------------------------------------------------------------------|------------------------------------------------------------------------------------------------------------|--------------------------------------------------------------------------------------------------------------|--------------------------------------------------------------------------------------------------------------------------------------------------------------------------------------------------------------------------|
| <b>Young</b><br> 3-4-month-old<br><b>Strains:</b><br>NSG<br>C57BL6 (WT)<br>Slco1c1 <sup>-/-</sup> ; Vcam1 <sup>fl/fl</sup> (TG)<br><b>Aged</b><br> 16-23-month-old |                     |  Aged human plasma >65 yr (AHP)<br> 19-month aged mouse plasma (AMP)<br>Heterochronic Parabiosis | Parabiosis<br>Plasma injections<br><br>α-VCAM1<br>α-VLA-4<br>Behavior: Barnes Maze, Novel Object, Contextual fear conditioning<br># Days: # of mice per group | #BrdU+ / Edu+<br> | #BrdU+ / Edu+<br>Sox2+<br>NPCs<br> | #DCX+<br> | #NeuN+ / Edu+<br> | Iba1+ %area<br> | Iba1+ CD68+ %area<br> | VCAM1+ Lectin+ BECs<br> | Barnes Maze (BM) Increase= Improved time to escape hole<br>Novel Object Recognition (NO) Increase= Increased interaction with novel object<br>Contextual fear conditioning (CFC) Increase= Increase in contextual memory |
| Young WT                                                                                                                                                                                                                                                                                                                                | 1: E11-m            | Heterochronic Parabiosis                                                                                                                                                                                                                                               | Parabiosis: 35 days; n=8-13/grp<br>4 days; n=10-11/grp                                                                                                                                                                                           |                                                                                                       |                                                                                                                         |                                                                                                |                                                                                                        |                                                                                                      |                                                                                                            |                                                                                                              |                                                                                                                                                                                                                          |
| Young WT                                                                                                                                                                                                                                                                                                                                | 3                   | AMP                                                                                                                                                                                                                                                                    | Tamoxifen (ip.) 4 days; 6 Cre- and 7 Cre+ mice/grp<br>Tamoxifen: 4 days; plasma; n=7-8/grp<br>α-VCAM1: 4 days; n=10/grp                                                                                                                          |                                                                                                       |                                                                                                                         |                                                                                                |                                                                                                        |                                                                                                      |                                                                                                            |                                                                                                              |                                                                                                                                                                                                                          |
| Young TG                                                                                                                                                                                                                                                                                                                                | E4e-i               | N/A                                                                                                                                                                                                                                                                    |                                                                                                                                                                                                                                                  |                                                                                                       |                                                                                                                         |                                                                                                |                                                                                                        |                                                                                                      |                                                                                                            |                                                                                                              |                                                                                                                                                                                                                          |
| Young TG                                                                                                                                                                                                                                                                                                                                | 4                   | AMP                                                                                                                                                                                                                                                                    |                                                                                                                                                                                                                                                  |                                                                                                       |                                                                                                                         |                                                                                                |                                                                                                        |                                                                                                      |                                                                                                            |                                                                                                              |                                                                                                                                                                                                                          |
| Young NSG                                                                                                                                                                                                                                                                                                                               | 5a-g                | AHP                                                                                                                                                                                                                                                                    |                                                                                                                                                                                                                                                  |                                                                                                       |                                                                                                                         |                                                                                                |                                                                                                        |                                                                                                      |                                                                                                            |                                                                                                              |                                                                                                                                                                                                                          |
| Young WT                                                                                                                                                                                                                                                                                                                                | 5h-n                | AMP                                                                                                                                                                                                                                                                    |                                                                                                                                                                                                                                                  |                                                                                                       |                                                                                                                         |                                                                                                |                                                                                                        |                                                                                                      |                                                                                                            |                                                                                                              |                                                                                                                                                                                                                          |
| Aged WT                                                                                                                                                                                                                                                                                                                                 | 6a-c; E5k-n; E9a-b  | N/A                                                                                                                                                                                                                                                                    |                                                                                                                                                                                                                                                  |                                                                                                       |                                                                                                                         |                                                                                                |                                                                                                        |                                                                                                      |                                                                                                            |                                                                                                              |                                                                                                                                                                                                                          |
| Aged TG                                                                                                                                                                                                                                                                                                                                 | 6d-f; E7; E8; E9c-d | N/A                                                                                                                                                                                                                                                                    | Tamoxifen, 16 months aging; n=7-8/grp<br>21 days; n=5/grp                                                                                                                                                                                        |                                                                                                       |                                                                                                                         |                                                                                                |                                                                                                        |                                                                                                      |                                                                                                            |                                                                                                              |                                                                                                                                                                                                                          |
| Young NSG                                                                                                                                                                                                                                                                                                                               | E4a-d               | AHP                                                                                                                                                                                                                                                                    |                                                                                                                                                                                                                                                  |                                                                                                       |                                                                                                                         |                                                                                                |                                                                                                        |                                                                                                      |                                                                                                            |                                                                                                              |                                                                                                                                                                                                                          |
| Young TG                                                                                                                                                                                                                                                                                                                                | E5a-j               | AMP                                                                                                                                                                                                                                                                    | Tamoxifen; 20 days plasma; n=8/grp                                                                                                                                                                                                               |                                                                                                       |                                                                                                                         |                                                                                                |                                                                                                        |                                                                                                      |                                                                                                            |                                                                                                              |                                                                                                                                                                                                                          |
| Young NSG                                                                                                                                                                                                                                                                                                                               | E6a-j               | svVCAM1-depleted AHP                                                                                                                                                                                                                                                   |                                                                                                                                                                                                                                                  |                                                                                                       |                                                                                                                         |                                                                                                |                                                                                                        |                                                                                                      |                                                                                                            |                                                                                                              |                                                                                                                                                                                                                          |
| Young NSG                                                                                                                                                                                                                                                                                                                               | E6k-p               | AHP                                                                                                                                                                                                                                                                    |                                                                                                                                                                                                                                                  |                                                                                                       |                                                                                                                         |                                                                                                |                                                                                                        |                                                                                                      |                                                                                                            |                                                                                                              |                                                                                                                                                                                                                          |
| Aged WT                                                                                                                                                                                                                                                                                                                                 | E9k-p               | N/A                                                                                                                                                                                                                                                                    | α-VCAM1; 21 days; n=10/grp<br>α-VLA-4; 21 days; n=7/grp                                                                                                                                                                                          |                                                                                                       |                                                                                                                         |                                                                                                |                                                                                                        |                                                                                                      |                                                                                                            |                                                                                                              |                                                                                                                                                                                                                          |
| Aged WT (17-month-old)                                                                                                                                                                                                                                                                                                                  | 6g-h                | N/A                                                                                                                                                                                                                                                                    |                                                                                                                                                                                                                                                  |                                                                                                       |                                                                                                                         |                                                                                                |                                                                                                        |                                                                                                      |                                                                                                            |                                                                                                              |                                                                                                                                                                                                                          |
| Aged WT (23-month-old)                                                                                                                                                                                                                                                                                                                  | 6i; E9h-j           | N/A                                                                                                                                                                                                                                                                    | α-VCAM1; one month; Behavior; n=15 mice/group<br>α-VCAM1; one month; Behavior; n=7-13 mice/group<br>α-VCAM1; one month; Behavior; n=11 mice/group                                                                                                |                                                                                                       |                                                                                                                         |                                                                                                |                                                                                                        |                                                                                                      |                                                                                                            |                                                                                                              |                                                                                                                                                                                                                          |
| Aged NSG (13-month-old)                                                                                                                                                                                                                                                                                                                 | E9e-g               | N/A                                                                                                                                                                                                                                                                    |                                                                                                                                                                                                                                                  |                                                                                                       |                                                                                                                         |                                                                                                |                                                                                                        |                                                                                                      |                                                                                                            |                                                                                                              |                                                                                                                                                                                                                          |

\*Changes in Neurogenesis, Microglial Activation and VCAM1 are relative to young mouse plasma-injected genotype-matched control mice. PBS-injected control mice, young genotype-matched isochronic mice, or IgG isotype treated control mice. WT= wildtype (C57BL6) mice; NSG= immunodeficient mice; TG= tamoxifen-treated Vcam1<sup>fl/fl</sup>Slco1c1-Cre<sup>ERT2+</sup> mice

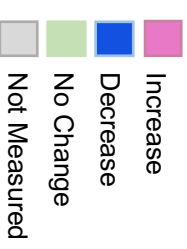

Supplement: NIHMS1523758-supplement-Supplementary_Tables.pdf [file NIHMS1523758-supplement-Supplementary_Tables.pdf]
